# Supplementary material for: Identification of diagnostic biomarkers and therapeutic targets in peripheral immune landscape from coronary artery disease
Source: Springer Nature journal article supplement (doi:10.1186/s12967-022-03614-1), 2022-09-05
Supplement: MOESM1 [file 23455006]

Table S1 Clinical and demographic characteristics of GSE20680, GSE20681 and GSE42148

|                        | Clinical factors<br>N(%)   | GSE20680          |             |       | GSE20681         |             |       | GSE42148(20 samples was provided)* |                |        |
|------------------------|----------------------------|-------------------|-------------|-------|------------------|-------------|-------|------------------------------------|----------------|--------|
|                        |                            | Controls<br>N=108 | CAD<br>N=87 | P     | Controls<br>N=99 | CAD<br>N=99 | P     | Controls<br>N=10                   | CADs<br>N=10   | P      |
| General<br>information | Sex (male)                 | 55(50.9%)         | 58 (66.7%)  | 0.039 | 75(75.8%)        | 75 (75.8%)  | 0.868 | 10 (100%)                          | 10 (100%)      | > 0.99 |
|                        | Age (yrs)                  | 55 ± 11           | 63 ± 10     | <0.01 | 55 ± 12          | 62 ± 11     | <0.01 | 46.70 ± 1.430                      | 48.7 ± 0.761   | 0.779  |
|                        | Caucasian                  | 56 (51.9%)        | 60 (69%)    | 0.023 | 85(85.9%)        | 92 (92.9%)  | 0.166 | —                                  | —              | —      |
|                        | BMI                        | 32 ± 7            | 30 ± 6      | 0.098 | 30 ± 7           | 30 ± 6      | 0.722 | 23.98 ± 1.603                      | 24.26 ± 0.87   | 0.878  |
|                        | Waist circumference (cm)   | —                 | —           | —     | —                | —           | —     | 87.10 ± 4.100                      | 87.90 ± 1.99   | 0.863  |
|                        | Hip circumference (cm)     | —                 | —           | —     | —                | —           | —     | 88.99 ± 3.620                      | 88.20 ± 1.610  | 0.863  |
|                        | Waist/hip ratio (cm)       | —                 | —           | —     | —                | —           | —     | 0.97 ± 0.029                       | 0.99 ± 0.016   | 0.709  |
| Medical<br>history     | Current Smoker             | 41 (38%)          | 45 (51.7%)  | 0.075 | 14(14.1%)        | 25 (25.3%)  | 0.074 | 5 (50.0%)                          | 5 (50.0%)      | 0.672  |
|                        | Systolic BP                | 144 ± 22          | 153 ± 25    | <0.01 | 132 ± 17         | 138 ± 18    | <0.01 | —                                  | —              | —      |
|                        | Diastolic BP               | 83 ± 13           | 87 ± 15     | 0.077 | 82 ± 11          | 80 ± 12     | 0.271 | —                                  | —              | —      |
|                        | Hypertension               | 67 (62%)          | 65 (74.7%)  | 0.084 | 55(55.6%)        | 65 (65.7%)  | 0.191 | 2 (20.0%)                          | 4 (40.0%)      | 0.314  |
|                        | Dyslipidemia               | 55 (50.9%)        | 58 (66.7%)  | 0.039 | 50(50.5%)        | 69 (69.7%)  | 0.009 | —                                  | —              | —      |
|                        | Diabetes mellitus          | —                 | —           | —     | —                | —           | —     | 4 (40.0%)                          | 4 (40.0%)      | 0.675  |
|                        | -TC (mg/dL)                | —                 | —           | —     | —                | —           | —     | 154.30 ± 7.949                     | 129.11 ± 8.200 | 0.052  |
| Laboratory<br>studies  | -TG (mg/dL)                | —                 | —           | —     | —                | —           | —     | 190.60 ± 27.06                     | 149.89 ± 17.70 | 0.227  |
|                        | -HDL-c(mg/dL)              | —                 | —           | —     | —                | —           | —     | 33.70 ± 1.814                      | 37.22 ± 1.498  | 0.072  |
|                        | -LDL-c(mg/dL)              | —                 | —           | —     | —                | —           | —     | 83.480 ± 9.857                     | 61.91 ± 6.17   | 0.084  |
|                        | FBS mg/L                   | —                 | —           | —     | —                | —           | —     | 115 ± 21.310                       | 104.00 ± 19.67 | 0.705  |
|                        | Neutrophil Count           | 3.8 ± 1.2         | 4 ± 1.3     | 0.392 | 3.9 ± 1.2        | 4.3 ± 1.5   | 0.037 | —                                  | —              | —      |
|                        | Lymphocyte Count           | 1.8 ± 0.7         | 1.9 ± 0.7   | 0.87  | 2 ± 0.7          | 1.9 ± 0.6   | 0.239 | —                                  | —              | —      |
|                        | Statin                     | —                 | —           | —     | —                | —           | —     | 0                                  | 9(90.0%)       | < 0.01 |
| Treatment              | Beta blocker               | —                 | —           | —     | —                | —           | —     | 0                                  | 7(70.0%)       | < 0.01 |
|                        | Calcium channel<br>Blocker | —                 | —           | —     | —                | —           | —     | 0                                  | 0              | > 0.99 |
|                        | ACE inhibitor              | —                 | —           | —     | —                | —           | —     | 1(10.0%)                           | 1(10.0%)       | 0.901  |
|                        | Antiplatelet               | —                 | —           | —     | —                | —           | —     | 1(10.0%)                           | 3(30.0%)       | 0.053  |
|                        | Hypoglycemic agents        | —                 | —           | —     | —                | —           | —     | 0                                  | 5(50.0%)       | < 0.01 |
|                        | Nitrate                    | —                 | —           | —     | —                | —           | —     | 4(40.0%)                           | 2(20.0%)       | 0.239  |
|                        |                            |                   |             |       |                  |             |       | 0                                  | 8(80%)         | < 0.01 |

\* Available sample data/total sample data: Controls(N=217/218), CADs(N=196/199)
